# Supplementary material
Source: ML conference proceedings conference paper supplement (https://openreview.net/forum?id=KzfhxLoh6s0)
Supplement: supplementary_material [file attachment]

## Appendix

### A ADDITIONAL EXPERIMENTS

**$4 \times 4$  Frozen Lake problem.** The  $4 \times 4$  frozen lake is similar to the  $8 \times 8$  one but with a smaller map. Similarly, we randomly generate the utility signal for each state-action pair. The results are shown in Fig.4.

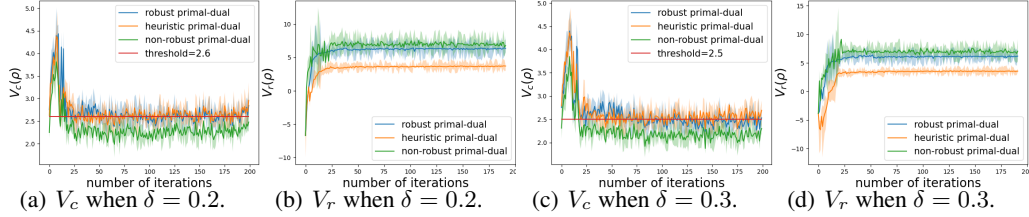

Figure 4: Comparison on  $4 \times 4$  Frozen-Lake Problem.

**$N$ -Chain problem.** We then compare three algorithms under the  $N$ -Chain problem environment. The  $N$ -chain problem involves a chain contains  $N$  nodes. The agent can either move to its left or right node. When it goes to left, it receives a reward-utility signal  $(1, 0)$ ; When it goes right, it receives a reward-utility signal  $(0, 2)$ , and if the agent arrives the  $N$ -th node, it receives a bonus reward of 40. There is also a small probability that the agent slips to the different direction of its action. In this experiment, we set  $N = 40$ . The results are shown in Fig.5.

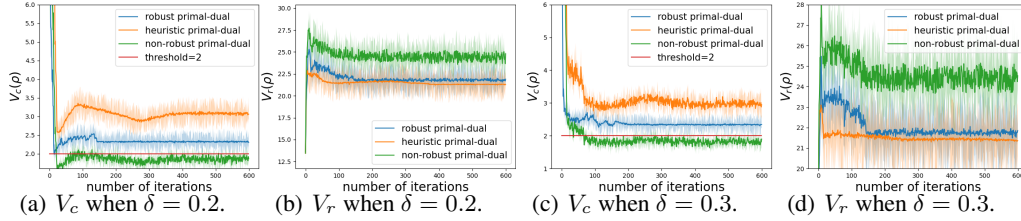

Figure 5: Comparison on  $N$ -Chain Problem.

### B PROOF OF TWO EQUIVALENT FORMULATION OF LAGRANGIAN FUNCTIONS

Consider the problem

$$\max_{\pi} \min_{\mathbf{P}} V_{\mathbf{P},r}^{\pi}, \quad (18)$$

$$s.t. \min_{\mathbf{P}} V_{\mathbf{P},c}^{\pi} \geq 0 \quad (19)$$

The Lagrangian function of it is given by  $L(\pi, \lambda) = \min_{\mathbf{P}} V_{\mathbf{P},r}^{\pi} + \lambda \min_{\mathbf{P}} V_{\mathbf{P},c}^{\pi}$ . Hence the original problem is equivalent to the problem  $\max_{\pi} \min_{\lambda \geq 0} L(\pi, \lambda)$ .

We also consider an alternative problem formulation  $\max_{\pi} \min_{\lambda \geq 0} \hat{L}(\pi, \lambda)$ , where  $\hat{L}(\pi, \lambda) = \min_{\mathbf{P}} \{V_{\mathbf{P},r}^{\pi} + \lambda V_{\mathbf{P},c}^{\pi}\}$ . These two problem is actually equivalent, i.e.,  $\min_{\lambda \geq 0} L(\pi, \lambda) = \min_{\lambda \geq 0} \hat{L}(\pi, \lambda)$  for any  $\pi$ .

*Proof.* For the feasible policies, i.e.,  $V_{\mathbf{P},c}^{\pi} \geq 0$  for any  $\mathbf{P} \in \mathcal{P}$ . Thus

$$\begin{aligned} \min_{\lambda \geq 0} \hat{L}(\pi, \lambda) &= \min_{\lambda \geq 0} \min_{\mathbf{P} \in \mathcal{P}} \{V_{\mathbf{P},r}^{\pi} + \lambda V_{\mathbf{P},c}^{\pi}\} \\ &= \min_{\mathbf{P} \in \mathcal{P}} \min_{\lambda \geq 0} \{V_{\mathbf{P},r}^{\pi} + \lambda V_{\mathbf{P},c}^{\pi}\} \end{aligned}$$

$$\begin{aligned}
&= \min_{\mathbf{P} \in \mathcal{P}} \{V_{\mathbf{P},r}^\pi + \min_{\lambda \geq 0} \lambda V_{\mathbf{P},c}^\pi\} \\
&= \min_{\mathbf{P} \in \mathcal{P}} V_{\mathbf{P},r}^\pi.
\end{aligned} \tag{20}$$

On the other hand,

$$\begin{aligned}
\min_{\lambda \geq 0} L(\pi, \lambda) &= \min_{\lambda \geq 0} \{ \min_{\mathbf{P} \in \mathcal{P}} V_{\mathbf{P},r}^\pi + \min_{\mathbf{P} \in \mathcal{P}} \lambda V_{\mathbf{P},c}^\pi \} \\
&= \min_{\mathbf{P} \in \mathcal{P}} V_{\mathbf{P},r}^\pi + \min_{\lambda \geq 0} \min_{\mathbf{P} \in \mathcal{P}} \lambda V_{\mathbf{P},c}^\pi \\
&= \min_{\mathbf{P} \in \mathcal{P}} V_{\mathbf{P},r}^\pi.
\end{aligned} \tag{21}$$

For any infeasible  $\pi$ , i.e.,  $\exists \mathbf{P}' \in \mathcal{P}$ , s.t.  $\min_{\mathbf{P}} V_{\mathbf{P},c}^\pi < 0$ . Clearly  $\min_{\lambda \geq 0} L(\pi, \lambda) = -\infty$ . And

$$\min_{\lambda \geq 0} \hat{L}(\pi, \lambda) = \min_{\lambda \geq 0} \min_{\mathbf{P} \in \mathcal{P}} \{V_{\mathbf{P},r}^\pi + \lambda V_{\mathbf{P},c}^\pi\} \leq \min_{\lambda \geq 0} \{V_{\mathbf{P}',r}^\pi + \lambda V_{\mathbf{P}',c}^\pi\} = -\infty. \tag{22}$$

Hence  $\min_{\lambda \geq 0} L(\pi, \lambda) = \min_{\lambda \geq 0} \hat{L}(\pi, \lambda)$  for any  $\pi$ , and hence the two problems are equivalent.  $\square$

## C PROOF OF LEMMA 1

Denote by  $\mathbf{P}^\pi = \{(p^\pi)_s^a \in \Delta_{\mathcal{S}} : s \in \mathcal{S}, a \in \mathcal{A}\}$  the worst-case transition kernel corresponding to the policy  $\pi$ . We consider the  $\delta$ -contamination uncertainty set defined in Section 4. We then show that under  $\delta$ -contamination model, the set of visitation distributions is non-convex. The robust visitation distribution set can be written as follows:

$$\left\{ d \in \Delta_{\mathcal{S} \times \mathcal{A}} : \exists \pi \in \Pi, \text{ s.t. } \forall (s, a), \left\{ \begin{aligned} d(s, a) &= \pi(a|s) \sum_b d(s, b), \\ \gamma \sum_{s', a'} (p^\pi)_{s', s}^{a'} d(s', a') + (1 - \gamma) \rho(s) &= \sum_a d(s, a). \end{aligned} \right. \right\}. \tag{23}$$

Under the  $\delta$ -contamination model,  $\mathbf{P}^\pi$  can be explicated as  $(p^\pi)_{s, s'}^a = (1 - \delta) p_{s, s'}^a + \delta \mathbb{1}_{\{s' = \arg \min V^\pi\}}$ . Hence the set in eq. (23) can be rewritten as

$$\left\{ d \in \Delta_{\mathcal{S} \times \mathcal{A}} : \exists \pi, \text{ s.t. } \forall (s, a), \left\{ \begin{aligned} d(s, a) &= \pi(a|s) \left( \sum_b d(s, b) \right), \\ \gamma(1 - \delta) \sum_{s', a'} p_{s', s}^{a'} d(s', a') + \gamma \delta \mathbb{1}_{\{s = \arg \min V^\pi\}} &+ (1 - \gamma) \rho(s) = \sum_a d(s, a). \end{aligned} \right. \right\}. \tag{24}$$

Now consider any two pairs  $(\pi_1, d_1), (\pi_2, d_2)$  of policy and their worst-case visitation distribution, to show that the set is convex, we need to find a pair  $(\pi', d')$  such that  $\forall \lambda \in [0, 1]$  and  $\forall s, a$ ,

$$\lambda d_1(s, a) + (1 - \lambda) d_2(s, a) = d'(s, a), \tag{25}$$

$$d'(s, a) = \pi'(a|s) \left( \sum_b d'(s, b) \right), \tag{26}$$

$$\sum_{a'} d'(s, a') = \gamma(1 - \delta) \sum_{s', a'} p_{s', s}^{a'} d'(s', a') + \gamma \delta \mathbb{1}_{\{s = \arg \min V^{\pi'}\}} + (1 - \gamma) \rho(s). \tag{27}$$

eq. (27) firstly implies that  $\forall s$ ,

$$\lambda \mathbb{1}_{\{s = \arg \min V^{\pi_1}\}} + (1 - \lambda) \mathbb{1}_{\{s = \arg \min V^{\pi_2}\}} = \mathbb{1}_{\{s = \arg \min V^{\pi'}\}}, \tag{28}$$

where from eq. (25) and eq. (26),  $\pi'$  should be

$$\pi'(a|s) = \frac{d'(s, a)}{\sum_b d'(s, b)} = \frac{\lambda d_1(s, a) + (1 - \lambda) d_2(s, a)}{\sum_b (\lambda d_1(s, b) + (1 - \lambda) d_2(s, b))}. \tag{29}$$

We then construct the following counterexample, which shows that there exists a robust MDP, two policy-distribution pairs  $(\pi_1, d_1)$ ,  $(\pi_2, d_2)$ , and  $\lambda \in (0, 1)$ , such that  $\lambda \mathbb{1}_{\{s=\arg \min V^{\pi_1}\}} + (1 - \lambda) \mathbb{1}_{\{s=\arg \min V^{\pi_2}\}} \neq \mathbb{1}_{\{s=\arg \min V^{\pi'}\}}$ , and therefore the set of robust visitation distribution is non-convex.

Consider the following Robust MDP. It has three states 1, 2, 3 and two actions  $a, b$ . When the agent is at state 1, if it takes action  $a$ , the system will transit to state 2 and receive reward  $r = 0$ ; if it takes action  $b$ , the system will transit to state 3 and receive reward  $r = 2$ . When the agent is at state 2/3, it can only take action  $a/b$ , the system can only transits back to state 1 and the agent will receive reward  $r = 1$ . The initial distribution is  $\mathbb{1}_{s=1}$ .

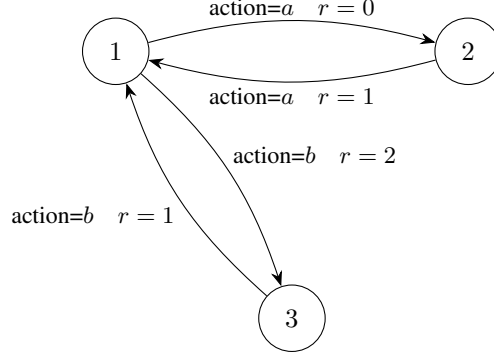

Clearly all policy can be written as  $\pi = (p, 1 - p)$ , where  $p$  is the probability of taking action  $a$  at state 1. We consider two policies,  $\pi_1 = (1, 0)$  and  $\pi_2 = (0, 1)$ .

It can be verified that  $\arg \min V^{\pi_1} = 1$ , and its robust visitation distribution, denoted by  $d_1$ , is

$$d_1(1, a) = \frac{1 - \gamma}{1 - \gamma^2}, \quad (30)$$

$$d_1(1, b) = 0, \quad (31)$$

$$d_1(2, a) = \frac{\gamma(1 - \gamma)}{1 - \gamma^2}, \quad (32)$$

$$d_1(2, b) = 0, \quad (33)$$

$$d_1(3, a) = 0, \quad (34)$$

$$d_1(3, b) = 0. \quad (35)$$

Similarly,  $\arg \min V^{\pi_2} = 2$ , and its robust visitation distribution, denoted by  $d_2$ , is

$$d_2(1, a) = 0, \quad (36)$$

$$d_2(1, b) = \frac{1 - \gamma}{1 - \gamma^2}, \quad (37)$$

$$d_2(2, a) = 0, \quad (38)$$

$$d_2(2, b) = 0, \quad (39)$$

$$d_2(3, a) = 0, \quad (40)$$

$$d_2(3, b) = \frac{\gamma(1 - \gamma)}{1 - \gamma^2}. \quad (41)$$

Hence according to eq. (29),  $\pi'$  should be as follows:

$$\pi'(a|1) = \lambda, \pi'(b|1) = 1 - \lambda, \pi'(a|2) = 1, \pi'(b|3) = 1. \quad (42)$$

We then show that there exists  $\lambda \in [0, 1]$ , such that  $\lambda \mathbb{1}_{\{s=1\}} + (1 - \lambda) \mathbb{1}_{\{s=2\}} \neq \mathbb{1}_{\{\arg \min V^{\pi'}\}}$ .

Clearly eq. (28) holds only if  $V^{\pi'}(1) = V^{\pi'}(2) = \min_s V^{\pi'}(s)$ . However, according to the Bellman equations for  $\pi'$ , we have that

$$V^{\pi'}(1) = \lambda(\gamma(1 - \delta)V^{\pi'}(2) + \gamma\delta \min V^{\pi'}) + (1 - \lambda)(2 + \gamma(1 - \delta)V^{\pi'}(3) + \gamma\delta \min V^{\pi'}), \quad (43)$$

$$V^{\pi'}(2) = 1 + \gamma(1 - \delta)V^{\pi'}(1) + \gamma\delta \min V^{\pi'}, \quad (44)$$

$$V^{\pi'}(3) = 1 + \gamma(1 - \delta)V^{\pi'}(1) + \gamma\delta \min V^{\pi'}. \quad (45)$$

If we set  $\lambda = \frac{1}{3}$ ,

$$V^{\pi'}(1) = \frac{4}{3} + \gamma\delta \min V^{\pi'} + \gamma(1 - \delta)V^{\pi'}(2), \quad (46)$$

$$V^{\pi'}(2) = 1 + \gamma\delta \min V^{\pi'} + \gamma(1 - \delta)V^{\pi'}(1). \quad (47)$$

Clearly,  $V^{\pi'}(1) \neq V^{\pi'}(2)$ , and hence  $\lambda \mathbb{1}_{\{\arg \min V^1\}} + (1 - \lambda) \mathbb{1}_{\{\arg \min V^2\}} \neq \mathbb{1}_{\{\arg \min V^{\pi'}\}}$ .

## D PROOF OF LEMMAS 2 AND 5

### Proof of Lemma 2

*Proof.* We first set  $C = V_r^{\pi_{\theta^*}}(\rho) + \lambda^*(V_c^{\pi_{\theta^*}}(\rho) - b)$ , clearly  $\max_{\pi \in \Pi} V_r^\pi(\rho) + \lambda^*(V_c^\pi(\rho) - b) = C$ , and hence

$$C = \max_{\pi \in \Pi} V_r^\pi(\rho) + \lambda^*(V_c^\pi(\rho) - b) \geq V_r^{\pi^\zeta}(\rho) + \lambda^*(V_c^{\pi^\zeta}(\rho) - b) \geq V_r^{\pi^\zeta}(\rho) + \lambda^*\zeta. \quad (48)$$

Thus we have that

$$\lambda^* \leq \frac{C - V_r^{\pi^\zeta}(\rho)}{\zeta}. \quad (49)$$

Note that

$$C = \min_{\lambda \geq 0} \max_{\pi \in \Pi} V_r^\pi(\rho) + \lambda(V_c^\pi(\rho) - b) \stackrel{(a)}{\leq} \max_{\pi \in \Pi} V_r^\pi(\rho) \leq \frac{1}{1 - \gamma}, \quad (50)$$

where (a) is because  $\min_{\lambda \geq 0} \max_{\pi \in \Pi} V_r^\pi(\rho) + \lambda(V_c^\pi(\rho) - b)$  is less than the optimal value of inner problem when  $\lambda = 0$ , i.e.,  $\max_{\pi \in \Pi} V_r^\pi(\rho)$ , and  $\frac{1}{1 - \gamma}$  is the upper bound of robust value functions. Hence we have that

$$\lambda^* \leq \frac{1}{(1 - \gamma)\zeta}, \quad (51)$$

which completes the proof.  $\square$

### Proof of Lemma 5

*Proof.* Set  $C = V_{\sigma,r}^{\theta^*}(\rho) + \lambda^*(V_{\sigma,c}^{\theta^*}(\rho) - b)$ , then

$$C = \max_{\pi \in \Pi} V_{\sigma,r}^\pi(\rho) + \lambda^*(V_{\sigma,c}^\pi(\rho) - b) \geq V_{\sigma,r}^{\pi^{\zeta'}}(\rho) + \lambda^*(V_{\sigma,c}^{\pi^{\zeta'}}(\rho) - b) \geq V_{\sigma,r}^{\pi^{\zeta'}}(\rho) + \lambda^*\zeta'. \quad (52)$$

Thus we have that

$$C \geq V_{\sigma,r}^{\pi^{\zeta'}}(\rho) + \lambda^*\zeta', \quad (53)$$

hence

$$\lambda^* \leq \frac{C - V_{\sigma,r}^{\pi^{\zeta'}}(\rho)}{\zeta'}. \quad (54)$$

Note that

$$C = \min_{\lambda \geq 0} \max_{\pi \in \Pi} V_{\sigma,r}^\pi(\rho) + \lambda(V_{\sigma,c}^\pi(\rho) - b) \leq \max_{\pi \in \Pi} V_{\sigma,r}^\pi(\rho) \leq C_\sigma, \quad (55)$$

where  $C_\sigma$  is the upper bound of smoothed robust value functions (Wang & Zou, 2022):  $C_\sigma = \frac{1}{1 - \gamma}(1 + 2\gamma R \frac{\log |\mathcal{S}|}{\sigma})$ . Hence we have that

$$\lambda^* \leq \frac{C_\sigma}{\zeta'}, \quad (56)$$

which completes the proof.  $\square$

## E PROOF OF LEMMA 6

*Proof.* For any  $\lambda$ , denote the optimal value of the inner problems  $\max_{\pi \in \Pi_\Theta} V_{\sigma,r}^\pi(\rho) + \lambda(V_{\sigma,c}^\pi(\rho) - b)$  and  $\max_{\pi \in \Pi_\Theta} V_r^\pi(\rho) + \lambda(V_c^\pi(\rho) - b)$  by  $V^D(\lambda)$  and  $V_\sigma^D(\lambda)$ . It is then easy to verify that

$$|V^D(\lambda) - V_\sigma^D(\lambda)| \leq (1 + \lambda)\epsilon \leq (1 + \Lambda^*)\epsilon. \quad (57)$$

Denote the optimal solutions of  $\min_{\lambda \in [0, \Lambda^*]} V^D(\lambda)$  and  $\min_{\lambda \in [0, \Lambda^*]} V_\sigma^D(\lambda)$  by  $\lambda^D$  and  $\lambda_\sigma^D$ . We thus conclude that  $|V_\sigma^D(\lambda_\sigma^D) - V^D(\lambda^D)| \leq (1 + \Lambda^*)\epsilon$ , and this thus completes the proof.  $\square$

## F PROOF OF THEOREM 1

We restate Theorem 1 with all the specific step sizes as follows.

Set  $b_t = \frac{19}{20\xi t^{0.25}}$ ,  $\mu_t = \xi(C_\sigma^V)^2 + \frac{16\tau(C_\sigma^V)^2}{\xi(b_{t+1})^2} - 2\nu$ ,  $\beta_t = \frac{1}{\xi}$ ,  $\alpha_t = \nu + \mu_t$ , where  $\xi > \frac{2\nu + (1 + \Lambda^*)L_\sigma}{(C_\sigma^V)^2}$ ,  $\nu$  is any positive number and  $\tau$  is any number greater than 2, then

$$\min_{1 \leq t \leq T} \|G_t\|^2 \leq 2\epsilon, \quad (58)$$

when

$$T = \max \left\{ \frac{7(\Lambda^*)^4}{\xi^4 \epsilon^4}, \left( 2 + \frac{9\xi(\tau - 2)(C_\sigma^V)^2 u K}{\epsilon^2} \right)^2 \right\} = \mathcal{O}(\epsilon^{-4}). \quad (59)$$

The definitions of  $u$ ,  $K$  can be found in Section J.

Theorem 1 can be proved similarly as Theorem 2, and hence the proof is omitted here.

## G PROOF OF LEMMA 3

*Proof.* Recall that  $V_\sigma^L(\theta, \lambda) = V_{\sigma,r}^{\pi_\theta}(\rho) + \lambda(V_{\sigma,c}^{\pi_\theta}(\rho) - b)$ , hence we have that

$$\nabla_\lambda V_\sigma^L(\theta, \lambda) = V_{\sigma,c}^{\pi_\theta}(\rho) - b, \quad (60)$$

$$\nabla_\theta V_\sigma^L(\theta, \lambda) = \nabla_\theta V_{\sigma,r}^{\pi_\theta}(\rho) + \lambda \nabla_\theta V_{\sigma,c}^{\pi_\theta}(\rho). \quad (61)$$

Note that in (Wang & Zou, 2022), it has been shown that

$$\|V_{\sigma,r}^{\pi_{\theta_1}} - V_{\sigma,r}^{\pi_{\theta_2}}\| \leq C_\sigma^V \|\theta_1 - \theta_2\|, \quad (62)$$

$$\|\nabla_\theta V_{\sigma,r}^{\pi_{\theta_1}} - \nabla_\theta V_{\sigma,r}^{\pi_{\theta_2}}\| \leq L_\sigma \|\theta_1 - \theta_2\|, \quad (63)$$

where the definition of constants  $C_\sigma^V$  and  $L_\sigma$  can be found in Section J. Hence

$$\|\nabla_\lambda V_\sigma^L(\theta, \lambda)|_{\theta_1} - \nabla_\lambda V_\sigma^L(\theta, \lambda)|_{\theta_2}\| = \|V_{\sigma,c}^{\pi_{\theta_1}}(\rho) - V_{\sigma,c}^{\pi_{\theta_2}}(\rho)\| \leq C_\sigma^V \|\theta_1 - \theta_2\|, \quad (64)$$

$$\|\nabla_\lambda V_\sigma^L(\theta, \lambda)|_{\lambda_1} - \nabla_\lambda V_\sigma^L(\theta, \lambda)|_{\lambda_2}\| = 0. \quad (65)$$

Similarly, we have that

$$\|\nabla_\theta V_\sigma^L(\theta, \lambda)|_{\theta_1} - \nabla_\theta V_\sigma^L(\theta, \lambda)|_{\theta_2}\| \leq (1 + \lambda)L_\sigma \|\theta_1 - \theta_2\| \leq (1 + \Lambda^*)L_\sigma \|\theta_1 - \theta_2\|, \quad (66)$$

$$\|\nabla_\theta V_\sigma^L(\theta, \lambda)|_{\lambda_1} - \nabla_\theta V_\sigma^L(\theta, \lambda)|_{\lambda_2}\| \leq |\lambda_1 - \lambda_2| \max_{\theta \in \Theta} \|\nabla_\theta V_{\sigma,c}^{\pi_\theta}(\rho)\| \leq C_\sigma^V |\lambda_1 - \lambda_2|. \quad (67)$$

This completes the proof.  $\square$

## H PROOF OF PROPOSITION 1

*Proof.* The  $\lambda$ -entry of  $G_W$  is smaller than  $2\epsilon$ , i.e.,

$$|(G_W)_\lambda| = \left| \beta_W \left( \lambda_W - \prod_{[0, \Lambda^*]} \left( \lambda_W - \frac{1}{\beta_W} (\nabla_\lambda V_\sigma^L(\theta_W, \lambda_W)) \right) \right) \right| < 2\epsilon. \quad (68)$$

Denote  $\lambda^+ \triangleq \prod_{[0, \Lambda^*]} \left( \lambda_W - \frac{1}{\beta_W} (\nabla_\lambda V_\sigma^L(\theta_W, \lambda_W)) \right)$ . From Lemma 3 in (Ghadimi & Lan, 2016),  $-\nabla_\lambda V_\sigma^L(\theta_W, \lambda^+)$  can be rewritten as the sum of two parts:  $-\nabla_\lambda V_\sigma^L(\theta_W, \lambda^+) \in N_{[0, \Lambda^*]}(\lambda^+) + 4\epsilon B$ , where  $N_K(x) \triangleq \{g \in \mathbb{R}^d : \langle g, y - x \rangle \leq 0 : \forall y \in K\}$  is the normal cone, and  $B$  is the unit ball.

This hence implies that for any  $\lambda \in [0, \Lambda^*]$ ,  $(\lambda - \lambda^+)(V_c^W - b) \geq -4(\lambda - \lambda^+)\epsilon$ . By setting  $\lambda = \Lambda^*$ , we have  $V_{c, \sigma}^W + 4\epsilon \geq b$ , which means  $\pi_W$  is feasible with a  $4\epsilon$ -violation.  $\square$

## I PROOF OF THEOREM 2

We then prove Theorem 2. Our proof extends the one in (Xu et al., 2020) to the biased setting.

To simplify notations, we denote the updates in Algorithm 3 by  $\hat{f}(\theta_t) \triangleq \hat{V}_{\sigma, c}^{\pi_{\theta_t}}(\rho) - b$ , and  $\hat{g}(\theta_t, \lambda_{t+1}) \triangleq \nabla_\theta \hat{V}_{\sigma, r}^{\pi_{\theta_t}}(\rho) + \lambda_{t+1} \nabla_\theta \hat{V}_{\sigma, c}^{\pi_{\theta_t}}(\rho)$ , and denote the update functions in Algorithm 1 by  $f(\theta_t) \triangleq V_{\sigma, c}^{\pi_{\theta_t}}(\rho) - b$ , and  $g(\theta_t, \lambda_{t+1}) \triangleq \nabla_\theta V_{\sigma, r}^{\pi_{\theta_t}}(\rho) + \lambda_{t+1} \nabla_\theta V_{\sigma, c}^{\pi_{\theta_t}}(\rho)$ . Here  $\hat{f}$  and  $\hat{g}$  can be viewed as biased estimations of  $f$  and  $g$ .

In the following, we will first show several technical lemmas that will be useful in the proof of Theorem 2.

**Lemma 7.** Recall that the step size  $\alpha_t = \nu + \mu_t$ . If  $\mu_t > (1 + \Lambda^*)L_\sigma$ ,  $\forall t \geq 0$ , then

$$\begin{aligned} V_\sigma^L(\theta_{t+1}, \lambda_{t+1}) - V_\sigma^L(\theta_t, \lambda_{t+1}) &\geq \langle \theta_{t+1} - \theta_t, -\hat{g}(\theta_t, \lambda_{t+1}) + g(\theta_t, \lambda_{t+1}) \rangle \\ &\quad + \left( \frac{\mu_t}{2} + \nu \right) \|\theta_{t+1} - \theta_t\|^2. \end{aligned} \quad (69)$$

*Proof.* Note that from the update of  $\theta_t$  and proposition of projection, it implies that

$$\left\langle \theta_t + \frac{1}{\alpha_t} \hat{g}(\theta_t, \lambda_{t+1}) - \theta_{t+1}, \theta_t - \theta_{t+1} \right\rangle \leq 0. \quad (70)$$

Hence

$$\langle \hat{g}(\theta_t, \lambda_{t+1}) - \alpha_t(\theta_{t+1} - \theta_t), \theta_t - \theta_{t+1} \rangle \leq 0. \quad (71)$$

From Lemma 3, we have that

$$V_\sigma^L(\theta_{t+1}, \lambda_{t+1}) - V_\sigma^L(\theta_t, \lambda_{t+1}) \geq \langle \theta_{t+1} - \theta_t, g(\theta_t, \lambda_{t+1}) \rangle - \frac{(1 + \Lambda^*)L_\sigma}{2} \|\theta_{t+1} - \theta_t\|^2. \quad (72)$$

Summing up the two inequalities implies

$$\begin{aligned} &V_\sigma^L(\theta_{t+1}, \lambda_{t+1}) - V_\sigma^L(\theta_t, \lambda_{t+1}) \\ &\geq \langle \theta_{t+1} - \theta_t, -\hat{g}(\theta_t, \lambda_{t+1}) + g(\theta_t, \lambda_{t+1}) + \alpha_t(\theta_{t+1} - \theta_t) \rangle - \frac{(1 + \Lambda^*)L_\sigma}{2} \|\theta_{t+1} - \theta_t\|^2 \\ &\geq \langle \theta_{t+1} - \theta_t, -\hat{g}(\theta_t, \lambda_{t+1}) + g(\theta_t, \lambda_{t+1}) \rangle + \left( \alpha_t - \frac{L_\sigma(1 + \Lambda^*)}{2} \right) \|\theta_{t+1} - \theta_t\|^2 \\ &\geq \langle \theta_{t+1} - \theta_t, -\hat{g}(\theta_t, \lambda_{t+1}) + g(\theta_t, \lambda_{t+1}) \rangle + \left( \frac{\mu_t}{2} + \nu \right) \|\theta_{t+1} - \theta_t\|^2, \end{aligned} \quad (73)$$

and hence completes the proof.  $\square$

**Lemma 8.** Recall that the step size  $\beta_t = \frac{1}{\xi}$ , and set  $\xi \leq \frac{1}{b_0}$ , then

$$\begin{aligned} &V_\sigma^L(\theta_{t+1}, \lambda_{t+1}) - V_\sigma^L(\theta_t, \lambda_t) \\ &\geq (f(\theta_{t-1}) - \hat{f}(\theta_{t-1}))(\lambda_{t+1} - \lambda_t) + \langle \theta_{t+1} - \theta_t, -\hat{g}(\theta_t, \lambda_{t+1}) + g(\theta_t, \lambda_{t+1}) \rangle - \frac{\xi(C_\sigma^V)^2}{2} \|\theta_t - \theta_{t-1}\|^2 \\ &\quad + \left( \frac{\mu_t}{2} + \nu \right) \|\theta_{t+1} - \theta_t\|^2 + \frac{b_{t-1}}{2} (\lambda_t^2 - \lambda_{t+1}^2) - \frac{1}{\xi} (\lambda_{t+1} - \lambda_t)^2 - \frac{1}{2\xi} (\lambda_t - \lambda_{t-1})^2. \end{aligned} \quad (74)$$

*Proof.* For any  $t > 1$ , define  $\tilde{V}_t(\theta, \lambda) \triangleq V_\sigma^L(\theta, \lambda) + \frac{b_{t-1}}{2}\lambda^2$ . Thus we have

$$|\nabla_\lambda \tilde{V}_t(\theta_t, \lambda_{t+1}) - \nabla_\lambda \tilde{V}_t(\theta_t, \lambda_t)| = b_{t-1}|\lambda_{t+1} - \lambda_t| \leq b_0|\lambda_{t+1} - \lambda_t|, \quad (75)$$

where that last inequality is due to  $b_{t-1} \leq b_0$ . Note that  $\tilde{V}_t(\theta, \lambda)$  is  $b_{t-1}$ -strongly convex in  $\lambda$ , hence we have

$$\begin{aligned} & (\nabla_\lambda \tilde{V}_t(\theta, \lambda_{t+1}) - \nabla_\lambda \tilde{V}_t(\theta, \lambda_t))(\lambda_{t+1} - \lambda_t) \\ & \geq b_{t-1}(\lambda_{t+1} - \lambda_t)^2 \\ & \geq b_{t-1} \left( \frac{b_{t-1} + b_0}{b_{t-1} + b_0} \right) (\lambda_{t+1} - \lambda_t)^2 \\ & = \frac{b_{t-1}b_0}{b_{t-1} + b_0}(\lambda_{t+1} - \lambda_t)^2 + \frac{b_{t-1}^2}{b_{t-1} + b_0}(\lambda_{t+1} - \lambda_t)^2 \\ & \geq \frac{b_{t-1}b_0}{b_{t-1} + b_0}(\lambda_{t+1} - \lambda_t)^2 + \frac{1}{b_{t-1} + b_0}(\nabla_\lambda \tilde{V}_t(\theta_t, \lambda_{t+1}) - \nabla_\lambda \tilde{V}_t(\theta_t, \lambda_t))^2, \end{aligned} \quad (76)$$

where the last inequality is from eq. (75).

Recall the update of  $\lambda_t$  in Algorithm 3 which can be rewritten as

$$\lambda_{t+1} = \prod_{[0, A^*]} \left( \lambda_t - \frac{1}{\beta_t} \nabla_\lambda \tilde{V}_{t+1}(\theta_t, \lambda_t) + \frac{1}{\beta_t} (f(\theta_t) - \hat{f}(\theta_t)) \right), \quad (77)$$

This further implies that  $\forall \lambda \in [0, A^*]$ :

$$(\beta_t(\lambda_{t+1} - \lambda_t) + \nabla_\lambda \tilde{V}_{t+1}(\theta_t, \lambda_t) - f(\theta_t) + \hat{f}(\theta_t))(\lambda - \lambda_{t+1}) \geq 0. \quad (78)$$

Hence setting  $\lambda = \lambda_k$  implies that

$$(\beta_t(\lambda_{t+1} - \lambda_t) + \nabla_\lambda \tilde{V}_{t+1}(\theta_t, \lambda_t) - f(\theta_t) + \hat{f}(\theta_t))(\lambda_t - \lambda_{t+1}) \geq 0. \quad (79)$$

Similarly, we have that

$$(\beta_t(\lambda_t - \lambda_{t-1}) + \nabla_\lambda \tilde{V}_t(\theta_{t-1}, \lambda_{t-1}) - f(\theta_{t-1}) + \hat{f}(\theta_{t-1}))(\lambda_{t+1} - \lambda_t) \geq 0. \quad (80)$$

Note that  $\tilde{V}_t$  is convex, we hence have that

$$\begin{aligned} & \tilde{V}_t(\theta_t, \lambda_{t+1}) - \tilde{V}_t(\theta_t, \lambda_t) \\ & \geq (\nabla_\lambda \tilde{V}_t(\theta_t, \lambda_t))(\lambda_{t+1} - \lambda_t) \\ & = (\nabla_\lambda \tilde{V}_t(\theta_t, \lambda_t) - \nabla_\lambda \tilde{V}_t(\theta_{t-1}, \lambda_{t-1}))(\lambda_{t+1} - \lambda_t) + (\nabla_\lambda \tilde{V}_t(\theta_{t-1}, \lambda_{t-1}))(\lambda_{t+1} - \lambda_t) \\ & \stackrel{(a)}{\geq} (\nabla_\lambda \tilde{V}_t(\theta_t, \lambda_t) - \nabla_\lambda \tilde{V}_t(\theta_{t-1}, \lambda_{t-1}))(\lambda_{t+1} - \lambda_t) \\ & \quad + (f(\theta_{t-1}) - \hat{f}(\theta_{t-1}) - \beta_t(\lambda_t - \lambda_{t-1}))(\lambda_{t+1} - \lambda_t), \end{aligned} \quad (81)$$

where (a) is from eq. (80). The first term in the RHS of eq. (81) can be further bounded as follows.

$$\begin{aligned} & (\nabla_\lambda \tilde{V}_t(\theta_t, \lambda_t) - \nabla_\lambda \tilde{V}_t(\theta_{t-1}, \lambda_{t-1}))(\lambda_{t+1} - \lambda_t) \\ & = (\nabla_\lambda \tilde{V}_t(\theta_t, \lambda_t) - \nabla_\lambda \tilde{V}_t(\theta_{t-1}, \lambda_t))(\lambda_{t+1} - \lambda_t) \\ & \quad + (\nabla_\lambda \tilde{V}_t(\theta_{t-1}, \lambda_t) - \nabla_\lambda \tilde{V}_t(\theta_{t-1}, \lambda_{t-1}))(\lambda_{t+1} - \lambda_t) \\ & = (\nabla_\lambda \tilde{V}_t(\theta_t, \lambda_t) - \nabla_\lambda \tilde{V}_t(\theta_{t-1}, \lambda_t))(\lambda_{t+1} - \lambda_t) \\ & \quad + (\nabla_\lambda \tilde{V}_t(\theta_{t-1}, \lambda_t) - \nabla_\lambda \tilde{V}_t(\theta_{t-1}, \lambda_{t-1}))(\lambda_t - \lambda_{t-1}) \\ & \quad + m_{t+1}(\nabla_\lambda \tilde{V}_t(\theta_{t-1}, \lambda_t) - \nabla_\lambda \tilde{V}_t(\theta_{t-1}, \lambda_{t-1})), \end{aligned} \quad (82)$$

where  $m_{t+1} \triangleq (\lambda_{t+1} - \lambda_t) - (\lambda_t - \lambda_{t-1})$ . Plug it in eq. (81) and we have that

$$\begin{aligned} & \tilde{V}_t(\theta_t, \lambda_{t+1}) - \tilde{V}_t(\theta_t, \lambda_t) \\ & \geq (f(\theta_{t-1}) - \hat{f}(\theta_{t-1}) - \beta_t(\lambda_t - \lambda_{t-1}))(\lambda_{t+1} - \lambda_t) \end{aligned}$$

$$\begin{aligned}
& + \underbrace{(\nabla_{\lambda} \tilde{V}_t(\theta_t, \lambda_t) - \nabla_{\lambda} \tilde{V}_t(\theta_{t-1}, \lambda_t))(\lambda_{t+1} - \lambda_t)}_{(a)} \\
& + \underbrace{(\nabla_{\lambda} \tilde{V}_t(\theta_{t-1}, \lambda_t) - \nabla_{\lambda} \tilde{V}_t(\theta_{t-1}, \lambda_{t-1}))(\lambda_t - \lambda_{t-1})}_{(b)} \\
& + \underbrace{(\nabla_{\lambda} \tilde{V}_t(\theta_{t-1}, \lambda_t) - \nabla_{\lambda} \tilde{V}_t(\theta_{t-1}, \lambda_{t-1}))m_{t+1}}_{(c)}. \tag{83}
\end{aligned}$$

We then provide bounds for each term in eq. (83) as follows.

Term (a) can be bounded as follows:

$$\begin{aligned}
& (\nabla_{\lambda} \tilde{V}_t(\theta_t, \lambda_t) - \nabla_{\lambda} \tilde{V}_t(\theta_{t-1}, \lambda_t))(\lambda_{t+1} - \lambda_t) \\
& = (\nabla_{\lambda} V_{\sigma}^L(\theta_t, \lambda_t) - \nabla_{\lambda} V_{\sigma}^L(\theta_{t-1}, \lambda_t))(\lambda_{t+1} - \lambda_t) \\
& \geq \frac{-(\lambda_{t+1} - \lambda_t)^2}{2\xi} - \frac{\xi}{2}(\nabla_{\lambda} V_{\sigma}^L(\theta_t, \lambda_t) - \nabla_{\lambda} V_{\sigma}^L(\theta_{t-1}, \lambda_t))^2 \\
& \geq \frac{-(\lambda_{t+1} - \lambda_t)^2}{2\xi} - \frac{\xi(C_{\sigma}^V)^2}{2}\|\theta_t - \theta_{t-1}\|^2, \tag{84}
\end{aligned}$$

which is from Cauchy-Schwarz inequality and  $C_{\sigma}^V$ -smoothness of  $V_{\sigma}^L(\theta, \lambda)$ .

Term (b) can be bounded as follows:

$$\begin{aligned}
& (\nabla_{\lambda} \tilde{V}_t(\theta_{t-1}, \lambda_t) - \nabla_{\lambda} \tilde{V}_t(\theta_{t-1}, \lambda_{t-1}))(\lambda_t - \lambda_{t-1}) \\
& \geq \frac{1}{b_{t-1} + b_0}(\nabla_{\lambda} \tilde{V}_t(\theta_{t-1}, \lambda_t) - \nabla_{\lambda} \tilde{V}_t(\theta_{t-1}, \lambda_{t-1}))^2, \tag{85}
\end{aligned}$$

which is from eq. (76).

Term (c) can be bounded as follows by Cauchy-Schwarz inequality:

$$\begin{aligned}
& m_{t+1}(\nabla_{\lambda} \tilde{V}_t(\theta_{t-1}, \lambda_t) - \nabla_{\lambda} \tilde{V}_t(\theta_{t-1}, \lambda_{t-1})) \\
& \geq -\frac{\xi}{2}(\nabla_{\lambda} \tilde{V}_t(\theta_{t-1}, \lambda_t) - \nabla_{\lambda} \tilde{V}_t(\theta_{t-1}, \lambda_{t-1}))^2 - \frac{1}{2\xi}m_{t+1}^2 \tag{86}
\end{aligned}$$

Moreover, it can be shown that

$$\frac{1}{\xi}(\lambda_{t+1} - \lambda_t)(\lambda_t - \lambda_{t-1}) = \frac{1}{2\xi}(\lambda_{t+1} - \lambda_t)^2 + \frac{1}{2\xi}(\lambda_t - \lambda_{t-1})^2 - \frac{1}{2\xi}m_{t+1}^2. \tag{87}$$

Plug eq. (84) to eq. (87) in 83, and we have that

$$\begin{aligned}
& \tilde{V}_t(\theta_t, \lambda_{t+1}) - \tilde{V}_t(\theta_t, \lambda_t) \\
& \geq (f(\theta_{t-1}) - \hat{f}(\theta_{t-1}))(\lambda_{t+1} - \lambda_t) - \beta_t(\lambda_t - \lambda_{t-1})(\lambda_{t+1} - \lambda_t) \\
& \quad + (\nabla_{\lambda} \tilde{V}_t(\theta_t, \lambda_t) - \nabla_{\lambda} \tilde{V}_t(\theta_{t-1}, \lambda_t))(\lambda_{t+1} - \lambda_t) + (\nabla_{\lambda} \tilde{V}_t(\theta_{t-1}, \lambda_t) - \nabla_{\lambda} \tilde{V}_t(\theta_{t-1}, \lambda_{t-1}))(\lambda_t - \lambda_{t-1}) \\
& \quad + m_{t+1}(\nabla_{\lambda} \tilde{V}_t(\theta_{t-1}, \lambda_t) - \nabla_{\lambda} \tilde{V}_t(\theta_{t-1}, \lambda_{t-1})) \\
& \geq (f(\theta_{t-1}) - \hat{f}(\theta_{t-1}))(\lambda_{t+1} - \lambda_t) - \frac{1}{2\xi}(\lambda_{t+1} - \lambda_t)^2 - \frac{1}{2\xi}(\lambda_t - \lambda_{t-1})^2 + \frac{1}{2\xi}m_{t+1}^2 \\
& \quad - \frac{(\lambda_{t+1} - \lambda_t)^2}{2\xi} - \frac{\xi(C_{\sigma}^V)^2}{2}\|\theta_t - \theta_{t-1}\|^2 + \frac{1}{b_{t-1} + b_0}(\nabla_{\lambda} \tilde{V}_t(\theta_{t-1}, \lambda_t) - \nabla_{\lambda} \tilde{V}_t(\theta_{t-1}, \lambda_{t-1}))^2 \\
& \quad - \frac{\xi}{2}(\nabla_{\lambda} \tilde{V}_t(\theta_{t-1}, \lambda_t) - \nabla_{\lambda} \tilde{V}_t(\theta_{t-1}, \lambda_{t-1}))^2 - \frac{1}{2\xi}m_{t+1}^2 \\
& \geq (f(\theta_{t-1}) - \hat{f}(\theta_{t-1}))(\lambda_{t+1} - \lambda_t) - \frac{1}{\xi}(\lambda_{t+1} - \lambda_t)^2 - \frac{1}{2\xi}(\lambda_t - \lambda_{t-1})^2 - \frac{\xi(C_{\sigma}^V)^2}{2}\|\theta_t - \theta_{t-1}\|^2. \tag{88}
\end{aligned}$$

From the definition of  $\tilde{V}_t$ , we have that

$$\tilde{V}_t(\theta_t, \lambda_{t+1}) - \tilde{V}_t(\theta_t, \lambda_t)$$



$$= V_\sigma^L(\theta_t, \lambda_{t+1}) + \frac{b_{t-1}}{2} \lambda_{t+1}^2 - V_\sigma^L(\theta_t, \lambda_t) - \frac{b_{t-1}}{2} \lambda_t^2. \quad (89)$$

Then we have that

$$\begin{aligned} & V_\sigma^L(\theta_t, \lambda_{t+1}) - V_\sigma^L(\theta_t, \lambda_t) \\ & \geq \frac{b_{t-1}}{2} (\lambda_t^2 - \lambda_{t+1}^2) + (f(\theta_{t-1}) - \hat{f}(\theta_{t-1}))(\lambda_{t+1} - \lambda_t) \\ & \quad - \frac{1}{\xi} (\lambda_{t+1} - \lambda_t)^2 - \frac{1}{2\xi} (\lambda_t - \lambda_{t-1})^2 - \frac{\xi(C_\sigma^V)^2}{2} \|\theta_t - \theta_{t-1}\|^2. \end{aligned} \quad (90)$$

Combining with Lemma 7, if  $\forall t, \mu_t > (1 + A^*)L_\sigma$ , we then have that

$$\begin{aligned} & V_\sigma^L(\theta_{t+1}, \lambda_{t+1}) - V_\sigma^L(\theta_t, \lambda_t) \\ & \geq (f(\theta_{t-1}) - \hat{f}(\theta_{t-1}))(\lambda_{t+1} - \lambda_t) + \langle \theta_{t+1} - \theta_t, -\hat{g}(\theta_t, \lambda_{t+1}) + g(\theta_t, \lambda_{t+1}) \rangle - \frac{\xi(C_\sigma^V)^2}{2} \|\theta_t - \theta_{t-1}\|^2 \\ & \quad + \left( \frac{\mu_t}{2} + \nu \right) \|\theta_{t+1} - \theta_t\|^2 + \frac{b_{t-1}}{2} (\lambda_t^2 - \lambda_{t+1}^2) - \frac{1}{\xi} (\lambda_{t+1} - \lambda_t)^2 - \frac{1}{2\xi} (\lambda_t - \lambda_{t-1})^2. \end{aligned} \quad (91)$$

□

**Lemma 9.** *Define*

$$\begin{aligned} F_{t+1} \triangleq & -\frac{8}{\xi^2 b_{t+1}} (\lambda_t - \lambda_{t+1})^2 - \frac{8}{\xi} \left( 1 - \frac{b_t}{b_{t+1}} \right) \lambda_{t+1}^2 + V_\sigma^L(\theta_{t+1}, \lambda_{t+1}) + \frac{b_t}{2} \lambda_{t+1}^2 \\ & + \left( -\frac{16(C_\sigma^V)^2}{\xi b_{t+1}^2} - \frac{\xi(C_\sigma^V)^2}{2} \right) \|\theta_{t+1} - \theta_t\|^2 + \left( \frac{8}{\xi} - \frac{1}{2\xi} \right) (\lambda_{t+1} - \lambda_t)^2, \end{aligned} \quad (92)$$

and if  $\frac{1}{b_{t+1}} - \frac{1}{b_t} \leq \frac{\xi}{5}$ , then

$$\begin{aligned} & F_{t+1} - F_t \\ & \geq S_t + \left( \frac{\mu_t}{2} + \nu - \frac{16(C_\sigma^V)^2}{\xi b_{t+1}^2} - \frac{\xi(C_\sigma^V)^2}{2} \right) \|\theta_{t+1} - \theta_t\|^2 + \frac{b_t - b_{t-1}}{2} \lambda_{t+1}^2 \\ & \quad + \frac{9}{10\xi} (\lambda_{t+1} - \lambda_t)^2 + \frac{8}{\xi} \left( \frac{b_t}{b_{t+1}} - \frac{b_{t-1}}{b_t} \right) \lambda_{t+1}^2, \end{aligned} \quad (93)$$

where  $S_t \triangleq \frac{16}{b_t \xi} (f(\theta_{t-1}) - \hat{f}(\theta_{t-1}) - f(\theta_t) + \hat{f}(\theta_t))(-\lambda_t + \lambda_{t+1}) + (f(\theta_{t-1}) - \hat{f}(\theta_{t-1}))(\lambda_{t+1} - \lambda_t) + \langle \theta_{t+1} - \theta_t, -\hat{g}(\theta_t, \lambda_{t+1}) + g(\theta_t, \lambda_{t+1}) \rangle$ .

*Proof.* From eq. (79) and eq. (80), we have that

$$\begin{aligned} \beta_t m_{t+1}(\lambda_t - \lambda_{t+1}) & \geq (\nabla_\lambda \tilde{V}_{t+1}(\theta_t, \lambda_t) - \nabla_\lambda \tilde{V}_t(\theta_{t-1}, \lambda_{t-1}))(-\lambda_t + \lambda_{t+1}) \\ & \quad + (f(\theta_{t-1}) - \hat{f}(\theta_{t-1}) - f(\theta_t) + \hat{f}(\theta_t))(-\lambda_t + \lambda_{t+1}). \end{aligned} \quad (94)$$

The first term can be rewritten as

$$\begin{aligned} & (\nabla_\lambda \tilde{V}_{t+1}(\theta_t, \lambda_t) - \nabla_\lambda \tilde{V}_t(\theta_{t-1}, \lambda_{t-1}))(\lambda_{t+1} - \lambda_t) \\ & = (\nabla_\lambda \tilde{V}_{t+1}(\theta_t, \lambda_t) - \nabla_\lambda \tilde{V}_t(\theta_{t-1}, \lambda_t))(\lambda_{t+1} - \lambda_t) + (\nabla_\lambda \tilde{V}_t(\theta_{t-1}, \lambda_t) - \nabla_\lambda \tilde{V}_t(\theta_{t-1}, \lambda_{t-1}))(\lambda_{t+1} - \lambda_t) \\ & = (\nabla_\lambda \tilde{V}_{t+1}(\theta_t, \lambda_t) - \nabla_\lambda \tilde{V}_t(\theta_{t-1}, \lambda_t))(\lambda_{t+1} - \lambda_t) + (\nabla_\lambda \tilde{V}_t(\theta_{t-1}, \lambda_t) - \nabla_\lambda \tilde{V}_t(\theta_{t-1}, \lambda_{t-1}))(\lambda_t - \lambda_{t-1}) \\ & \quad + m_{t+1}(\nabla_\lambda \tilde{V}_t(\theta_{t-1}, \lambda_t) - \nabla_\lambda \tilde{V}_t(\theta_{t-1}, \lambda_{t-1})). \end{aligned} \quad (95)$$

The first term in eq. (95) can be bounded as

$$\begin{aligned} & (\nabla_\lambda \tilde{V}_{t+1}(\theta_t, \lambda_t) - \nabla_\lambda \tilde{V}_t(\theta_{t-1}, \lambda_t))(\lambda_{t+1} - \lambda_t) \\ & = (\nabla_\lambda V_\sigma^L(\theta_t, \lambda_t) - \nabla_\lambda V_\sigma^L(\theta_{t-1}, \lambda_t))(\lambda_{t+1} - \lambda_t) + (b_t \lambda_t - b_{t-1} \lambda_t)(\lambda_{t+1} - \lambda_t) \\ & \stackrel{(a)}{\geq} -\frac{1}{2h} (\nabla_\lambda V_\sigma^L(\theta_t, \lambda_t) - \nabla_\lambda V_\sigma^L(\theta_{t-1}, \lambda_t))^2 - \frac{h}{2} (\lambda_{t+1} - \lambda_t)^2 \end{aligned}$$

$$\begin{aligned}
& + \frac{(b_t - b_{t-1})}{2}(\lambda_{t+1}^2 - \lambda_t^2) - \frac{(b_t - b_{t-1})}{2}(\lambda_{t+1} - \lambda_t)^2 \\
& \stackrel{(b)}{\geq} -\frac{(C_\sigma^V)^2}{2h}\|\theta_t - \theta_{t-1}\|^2 - \frac{h}{2}(\lambda_{t+1} - \lambda_t)^2 \\
& + \frac{(b_t - b_{t-1})}{2}(\lambda_{t+1}^2 - \lambda_t^2) - \frac{(b_t - b_{t-1})}{2}(\lambda_{t+1} - \lambda_t)^2,
\end{aligned} \tag{96}$$

where (a) is from the Cauchy–Schwarz inequality and (b) is from the  $C_\sigma^V$ -smoothness of  $V_\sigma^L$ , for any  $h > 0$ .

Similar to eq. (76), the second term in eq. (95) can be bounded as

$$\begin{aligned}
& (\nabla_\lambda \tilde{V}_t(\theta_{t-1}, \lambda_t) - \nabla_\lambda \tilde{V}_t(\theta_{t-1}, \lambda_{t-1}))(\lambda_t - \lambda_{t-1}) \\
& \geq \frac{b_{t-1}b_0}{b_{t-1} + b_0}(\lambda_t - \lambda_{t-1})^2 + \frac{1}{b_{t-1} + b_0}(\nabla_\lambda \tilde{V}_t(\theta_{t-1}, \lambda_t) - \nabla_\lambda \tilde{V}_t(\theta_{t-1}, \lambda_{t-1}))^2.
\end{aligned} \tag{97}$$

The third term in eq. (95) can be bounded as

$$\begin{aligned}
& m_{t+1}(\nabla_\lambda \tilde{V}_t(\theta_{t-1}, \lambda_t) - \nabla_\lambda \tilde{V}_t(\theta_{t-1}, \lambda_{t-1})) \\
& \geq -\frac{\xi}{2}(\nabla_\lambda \tilde{V}_t(\theta_{t-1}, \lambda_t) - \nabla_\lambda \tilde{V}_t(\theta_{t-1}, \lambda_{t-1}))^2 - \frac{1}{2\xi}m_{t+1}^2.
\end{aligned} \tag{98}$$

Hence combine eq. (96) to eq. (97) and plug in eq. (95), we have that

$$\begin{aligned}
& (\nabla_\lambda \tilde{V}_{t+1}(\theta_t, \lambda_t) - \nabla_\lambda \tilde{V}_t(\theta_{t-1}, \lambda_{t-1}))(\lambda_{t+1} - \lambda_t) \\
& \geq -\frac{(C_\sigma^V)^2}{2h}\|\theta_t - \theta_{t-1}\|^2 - \frac{h}{2}(\lambda_{t+1} - \lambda_t)^2 \\
& + \frac{(b_t - b_{t-1})}{2}(\lambda_{t+1}^2 - \lambda_t^2) - \frac{(b_t - b_{t-1})}{2}(\lambda_{t+1} - \lambda_t)^2 \\
& + \frac{b_{t-1}b_0}{b_{t-1} + b_0}(\lambda_t - \lambda_{t-1})^2 + \frac{1}{b_{t-1} + b_0}(\nabla_\lambda \tilde{V}_t(\theta_{t-1}, \lambda_t) - \nabla_\lambda \tilde{V}_t(\theta_{t-1}, \lambda_{t-1}))^2 \\
& - \frac{\xi}{2}(\nabla_\lambda \tilde{V}_t(\theta_{t-1}, \lambda_t) - \nabla_\lambda \tilde{V}_t(\theta_{t-1}, \lambda_{t-1}))^2 - \frac{1}{2\xi}m_{t+1}^2.
\end{aligned} \tag{99}$$

Hence eq. (94) can be further bounded as

$$\begin{aligned}
& (\beta_t m_{t+1})(\lambda_t - \lambda_{t+1}) \\
& \geq (f(\theta_{t-1}) - \hat{f}(\theta_{t-1}) - f(\theta_t) + \hat{f}(\theta_t))(-\lambda_t + \lambda_{t+1}) \\
& - \frac{(C_\sigma^V)^2}{2h}\|\theta_t - \theta_{t-1}\|^2 - \frac{h}{2}(\lambda_{t+1} - \lambda_t)^2 \\
& + \frac{(b_t - b_{t-1})}{2}(\lambda_{t+1}^2 - \lambda_t^2) - \frac{(b_t - b_{t-1})}{2}(\lambda_{t+1} - \lambda_t)^2 \\
& + \frac{b_{t-1}b_0}{b_{t-1} + b_0}(\lambda_t - \lambda_{t-1})^2 + \frac{1}{b_{t-1} + b_0}(\nabla_\lambda \tilde{V}_t(\theta_{t-1}, \lambda_t) - \nabla_\lambda \tilde{V}_t(\theta_{t-1}, \lambda_{t-1}))^2 \\
& - \frac{\xi}{2}(\nabla_\lambda \tilde{V}_t(\theta_{t-1}, \lambda_t) - \nabla_\lambda \tilde{V}_t(\theta_{t-1}, \lambda_{t-1}))^2 - \frac{1}{2\xi}m_{t+1}^2.
\end{aligned} \tag{100}$$

It can be directly verified that

$$m_{t+1}(\lambda_t - \lambda_{t+1}) = \frac{1}{2}(\lambda_t - \lambda_{t-1})^2 - \frac{1}{2}(\lambda_t - \lambda_{t+1})^2 - \frac{m_{t+1}^2}{2}. \tag{101}$$

Recall that  $\beta_t = \frac{1}{\xi}$ , hence

$$\begin{aligned}
& \frac{1}{2\xi}(\lambda_t - \lambda_{t-1})^2 - \frac{1}{2\xi}(\lambda_t - \lambda_{t+1})^2 - \frac{m_{t+1}^2}{2\xi} \\
& \geq (f(\theta_{t-1}) - \hat{f}(\theta_{t-1}) - f(\theta_t) + \hat{f}(\theta_t))(-\lambda_t + \lambda_{t+1})
\end{aligned}$$

$$\begin{aligned}
& -\frac{(C_\sigma^V)^2}{2h}\|\theta_t - \theta_{t-1}\|^2 - \frac{h}{2}(\lambda_{t+1} - \lambda_t)^2 \\
& + \frac{(b_t - b_{t-1})}{2}(\lambda_{t+1}^2 - \lambda_t^2) - \frac{(b_t - b_{t-1})}{2}(\lambda_{t+1} - \lambda_t)^2 \\
& + \frac{b_{t-1}b_0}{b_{t-1} + b_0}(\lambda_t - \lambda_{t-1})^2 + \frac{1}{b_{t-1} + b_0}(\nabla_\lambda \tilde{V}_t(\theta_{t-1}, \lambda_t) - \nabla_\lambda \tilde{V}_t(\theta_{t-1}, \lambda_{t-1}))^2 \\
& - \frac{\xi}{2}(\nabla_\lambda \tilde{V}_t(\theta_{t-1}, \lambda_t) - \nabla_\lambda \tilde{V}_t(\theta_{t-1}, \lambda_{t-1}))^2 - \frac{1}{2\xi}m_{t+1}^2.
\end{aligned} \tag{102}$$

From  $\xi \leq \frac{1}{b_0} \leq \frac{2}{b_0 + b_{t-1}}$ , we have  $\frac{1}{b_{t-1} + b_0}(\nabla_\lambda \tilde{V}_t(\theta_{t-1}, \lambda_t) - \nabla_\lambda \tilde{V}_t(\theta_{t-1}, \lambda_{t-1}))^2 - \frac{\xi}{2}(\nabla_\lambda \tilde{V}_t(\theta_{t-1}, \lambda_t) - \nabla_\lambda \tilde{V}_t(\theta_{t-1}, \lambda_{t-1}))^2 \geq 0$ . Also, it can be shown that  $\frac{b_{t-1}b_0}{b_{t-1} + b_0} \geq \frac{b_{t-1}b_0}{2b_0} = \frac{b_{t-1}}{2}$ . Thus, it follows that

$$\begin{aligned}
& \frac{1}{2\xi}(\lambda_t - \lambda_{t-1})^2 - \frac{1}{2\xi}(\lambda_t - \lambda_{t+1})^2 - \frac{m_{t+1}^2}{2\xi} \\
& \geq (f(\theta_{t-1}) - \hat{f}(\theta_{t-1}) - f(\theta_t) + \hat{f}(\theta_t))(-\lambda_t + \lambda_{t+1}) \\
& - \frac{(C_\sigma^V)^2}{2h}\|\theta_t - \theta_{t-1}\|^2 - \frac{h}{2}(\lambda_{t+1} - \lambda_t)^2 \\
& + \frac{(b_t - b_{t-1})}{2}(\lambda_{t+1}^2 - \lambda_t^2) - \frac{(b_t - b_{t-1})}{2}(\lambda_{t+1} - \lambda_t)^2 \\
& + \frac{b_{t-1}}{2}(\lambda_t - \lambda_{t-1})^2 - \frac{1}{2\xi}m_{t+1}^2.
\end{aligned} \tag{103}$$

Re-arrange the terms, it follows that

$$\begin{aligned}
& -\frac{1}{2\xi}(\lambda_t - \lambda_{t+1})^2 - \frac{b_t - b_{t-1}}{2}\lambda_{t+1}^2 \\
& \geq (f(\theta_{t-1}) - \hat{f}(\theta_{t-1}) - f(\theta_t) + \hat{f}(\theta_t))(-\lambda_t + \lambda_{t+1}) - \frac{(C_\sigma^V)^2}{2h}\|\theta_t - \theta_{t-1}\|^2 - \frac{h}{2}(\lambda_{t+1} - \lambda_t)^2 \\
& - \frac{(b_t - b_{t-1})}{2}\lambda_t^2 - \frac{(b_t - b_{t-1})}{2}(\lambda_{t+1} - \lambda_t)^2 + \frac{b_{t-1}}{2}(\lambda_t - \lambda_{t-1})^2 - \frac{1}{2\xi}(\lambda_t - \lambda_{t-1})^2 \\
& \geq -\frac{1}{2\xi}(\lambda_t - \lambda_{t-1})^2 - \frac{(b_t - b_{t-1})}{2}\lambda_t^2 + (f(\theta_{t-1}) - \hat{f}(\theta_{t-1}) - f(\theta_t) + \hat{f}(\theta_t))(-\lambda_t + \lambda_{t+1}) \\
& - \frac{(C_\sigma^V)^2}{2h}\|\theta_t - \theta_{t-1}\|^2 - \frac{h}{2}(\lambda_{t+1} - \lambda_t)^2 + \frac{b_{t-1}}{2}(\lambda_t - \lambda_{t-1})^2,
\end{aligned} \tag{104}$$

where the last inequality is from the fact that  $b_t$  is decreasing.

Now multiply  $\frac{2}{\xi b_t}$  on both sides, we further have that

$$\begin{aligned}
& -\frac{1}{\xi^2 b_t}(\lambda_t - \lambda_{t+1})^2 - \frac{1}{\xi} \left(1 - \frac{b_{t-1}}{b_t}\right) \lambda_{t+1}^2 \\
& \geq -\frac{1}{\xi^2 b_t}(\lambda_t - \lambda_{t-1})^2 - \frac{1}{\xi} \left(1 - \frac{b_{t-1}}{b_t}\right) \lambda_t^2 + \frac{2}{\xi b_t}(f(\theta_{t-1}) - \hat{f}(\theta_{t-1}) - f(\theta_t) + \hat{f}(\theta_t))(-\lambda_t + \lambda_{t+1}) \\
& - \frac{(C_\sigma^V)^2}{h\xi b_t}\|\theta_t - \theta_{t-1}\|^2 - \frac{h}{\xi b_t}(\lambda_{t+1} - \lambda_t)^2 + \frac{1}{\xi}(\lambda_t - \lambda_{t-1})^2.
\end{aligned} \tag{105}$$

If we set  $h = \frac{b_t}{2}$ , eq. (105) can be rewritten as

$$\begin{aligned}
& -\frac{1}{\xi^2 b_t}(\lambda_t - \lambda_{t+1})^2 - \frac{1}{\xi} \left(1 - \frac{b_{t-1}}{b_t}\right) \lambda_{t+1}^2 \\
& \geq -\frac{1}{\xi^2 b_t}(\lambda_t - \lambda_{t-1})^2 - \frac{1}{\xi} \left(1 - \frac{b_{t-1}}{b_t}\right) \lambda_t^2 + \frac{2}{\xi b_t}(f(\theta_{t-1}) - \hat{f}(\theta_{t-1}) - f(\theta_t) + \hat{f}(\theta_t))(-\lambda_t + \lambda_{t+1}) \\
& - \frac{2(C_\sigma^V)^2}{\xi b_t^2}\|\theta_t - \theta_{t-1}\|^2 - \frac{1}{2\xi}(\lambda_{t+1} - \lambda_t)^2 + \frac{1}{\xi}(\lambda_t - \lambda_{t-1})^2.
\end{aligned} \tag{106}$$

Further we have that

$$\begin{aligned}
& -\frac{1}{\xi^2 b_{t+1}}(\lambda_t - \lambda_{t+1})^2 + \left(\frac{1}{\xi^2 b_{t+1}} - \frac{1}{\xi^2 b_t}\right)(\lambda_t - \lambda_{t+1})^2 - \frac{1}{\xi} \left(1 - \frac{b_t}{b_{t+1}}\right) \lambda_{t+1}^2 + \frac{1}{\xi} \left(\frac{b_{t-1}}{b_t} - \frac{b_t}{b_{t+1}}\right) \lambda_{t+1}^2 \\
& \geq -\frac{1}{\xi^2 b_t}(\lambda_t - \lambda_{t-1})^2 - \frac{1}{\xi} \left(1 - \frac{b_{t-1}}{b_t}\right) \lambda_t^2 + \frac{2}{\xi b_t} (f(\theta_{t-1}) - \hat{f}(\theta_{t-1}) - f(\theta_t) + \hat{f}(\theta_t))(-\lambda_t + \lambda_{t+1}) \\
& \quad - \frac{2(C_\sigma^V)^2}{\xi b_t^2} \|\theta_t - \theta_{t-1}\|^2 - \frac{1}{2\xi}(\lambda_{t+1} - \lambda_t)^2 + \frac{1}{\xi}(\lambda_t - \lambda_{t-1})^2. \tag{107}
\end{aligned}$$

Re-arranging the terms in eq. (107) implies that

$$\begin{aligned}
& -\frac{1}{\xi^2 b_{t+1}}(\lambda_t - \lambda_{t+1})^2 - \frac{1}{\xi} \left(1 - \frac{b_t}{b_{t+1}}\right) \lambda_{t+1}^2 - \left(-\frac{1}{\xi^2 b_t}(\lambda_t - \lambda_{t-1})^2 - \frac{1}{\xi} \left(1 - \frac{b_{t-1}}{b_t}\right) \lambda_t^2\right) \\
& \geq -\left(\frac{1}{\xi^2 b_{t+1}} - \frac{1}{\xi^2 b_t}\right)(\lambda_t - \lambda_{t+1})^2 - \frac{1}{\xi} \left(\frac{b_{t-1}}{b_t} - \frac{b_t}{b_{t+1}}\right) \lambda_{t+1}^2 \\
& \quad - \frac{2(C_\sigma^V)^2}{\xi b_t^2} \|\theta_t - \theta_{t-1}\|^2 - \frac{1}{2\xi}(\lambda_{t+1} - \lambda_t)^2 + \frac{1}{\xi}(\lambda_t - \lambda_{t-1})^2 \\
& \quad + \frac{2}{\xi b_t} (f(\theta_{t-1}) - \hat{f}(\theta_{t-1}) - f(\theta_t) + \hat{f}(\theta_t))(-\lambda_t + \lambda_{t+1}) \\
& \geq -\frac{7}{10\xi}(-\lambda_t + \lambda_{t+1})^2 - \frac{2(C_\sigma^V)^2}{\xi b_t^2} \|\theta_t - \theta_{t-1}\|^2 + \frac{1}{\xi}(\lambda_t - \lambda_{t-1})^2 + \frac{1}{\xi} \left(\frac{b_t}{b_{t+1}} - \frac{b_{t-1}}{b_t}\right) \lambda_{t+1}^2 \\
& \quad + \frac{2}{\xi b_t} (f(\theta_{t-1}) - \hat{f}(\theta_{t-1}) - f(\theta_t) + \hat{f}(\theta_t))(-\lambda_t + \lambda_{t+1}), \tag{108}
\end{aligned}$$

where the last inequality is from  $\frac{1}{b_{t+1}} - \frac{1}{b_t} \leq \frac{\xi}{5}$ . Recall in Lemma 8, we showed that

$$\begin{aligned}
& V_\sigma^L(\theta_{t+1}, \lambda_{t+1}) - V_\sigma^L(\theta_t, \lambda_t) \\
& \geq (f(\theta_{t-1}) - \hat{f}(\theta_{t-1}))(\lambda_{t+1} - \lambda_t) + \langle \theta_{t+1} - \theta_t, -\hat{g}(\theta_t, \lambda_{t+1}) + g(\theta_t, \lambda_{t+1}) \rangle - \frac{\xi(C_\sigma^V)^2}{2} \|\theta_t - \theta_{t-1}\|^2 \\
& \quad + \left(\frac{\mu_t}{2} + \nu\right) \|\theta_{t+1} - \theta_t\|^2 + \frac{b_{t-1}}{2}(\lambda_t^2 - \lambda_{t+1}^2) - \frac{1}{\xi}(\lambda_{t+1} - \lambda_t)^2 - \frac{1}{2\xi}(\lambda_t - \lambda_{t-1})^2. \tag{109}
\end{aligned}$$

Combine both inequality together, and we further have that

$$\begin{aligned}
& -\frac{8}{\xi^2 b_{t+1}}(\lambda_t - \lambda_{t+1})^2 - \frac{8}{\xi} \left(1 - \frac{b_t}{b_{t+1}}\right) \lambda_{t+1}^2 - \left(-\frac{8}{\xi^2 b_t}(\lambda_t - \lambda_{t-1})^2 - \frac{8}{\xi} \left(1 - \frac{b_{t-1}}{b_t}\right) \lambda_t^2\right) \\
& \quad + V_\sigma^L(\theta_{t+1}, \lambda_{t+1}) - V_\sigma^L(\theta_t, \lambda_t) \\
& \geq -\frac{28}{5\xi}(-\lambda_t + \lambda_{t+1})^2 - \frac{16(C_\sigma^V)^2}{\xi b_t^2} \|\theta_t - \theta_{t-1}\|^2 + \frac{8}{\xi}(\lambda_t - \lambda_{t-1})^2 + \frac{8}{\xi} \left(\frac{b_t}{b_{t+1}} - \frac{b_{t-1}}{b_t}\right) \lambda_{t+1}^2 \\
& \quad + \frac{16}{b_t \xi} (f(\theta_{t-1}) - \hat{f}(\theta_{t-1}) - f(\theta_t) + \hat{f}(\theta_t))(-\lambda_t + \lambda_{t+1}) \\
& \quad + (f(\theta_{t-1}) - \hat{f}(\theta_{t-1}))(\lambda_{t+1} - \lambda_t) + \langle \theta_{t+1} - \theta_t, -\hat{g}(\theta_t, \lambda_{t+1}) + g(\theta_t, \lambda_{t+1}) \rangle - \frac{\xi(C_\sigma^V)^2}{2} \|\theta_t - \theta_{t-1}\|^2 \\
& \quad + \left(\frac{\mu_t}{2} + \nu\right) \|\theta_{t+1} - \theta_t\|^2 + \frac{b_{t-1}}{2}(\lambda_t^2 - \lambda_{t+1}^2) - \frac{1}{\xi}(\lambda_{t+1} - \lambda_t)^2 - \frac{1}{2\xi}(\lambda_t - \lambda_{t-1})^2 \\
& = S_t + \left(-\frac{16(C_\sigma^V)^2}{\xi b_t^2} - \frac{\xi(C_\sigma^V)^2}{2}\right) \|\theta_t - \theta_{t-1}\|^2 + \left(-\frac{28}{5\xi} - \frac{1}{\xi}\right) (-\lambda_t + \lambda_{t+1})^2 + \frac{b_{t-1}}{2}(\lambda_t^2 - \lambda_{t+1}^2) \\
& \quad + \left(\frac{8}{\xi} - \frac{1}{2\xi}\right) (\lambda_t - \lambda_{t-1})^2 + \frac{8}{\xi} \left(\frac{b_t}{b_{t+1}} - \frac{b_{t-1}}{b_t}\right) \lambda_{t+1}^2 + \left(\frac{\mu_t}{2} + \nu\right) \|\theta_{t+1} - \theta_t\|^2, \tag{110}
\end{aligned}$$

where  $S_t \triangleq \frac{16}{b_t \xi} (f(\theta_{t-1}) - \hat{f}(\theta_{t-1}) - f(\theta_t) + \hat{f}(\theta_t))(-\lambda_t + \lambda_{t+1}) + (f(\theta_{t-1}) - \hat{f}(\theta_{t-1}))(\lambda_{t+1} - \lambda_t) + \langle \theta_{t+1} - \theta_t, -\hat{g}(\theta_t, \lambda_{t+1}) + g(\theta_t, \lambda_{t+1}) \rangle$ . Now

$$-\frac{8}{\xi^2 b_{t+1}}(\lambda_t - \lambda_{t+1})^2 - \frac{8}{\xi} \left(1 - \frac{b_t}{b_{t+1}}\right) \lambda_{t+1}^2 - \left(-\frac{8}{\xi^2 b_t}(\lambda_t - \lambda_{t-1})^2 - \frac{8}{\xi} \left(1 - \frac{b_{t-1}}{b_t}\right) \lambda_t^2\right)$$

$$\begin{aligned}
& + V_\sigma^L(\theta_{t+1}, \lambda_{t+1}) - V_\sigma^L(\theta_t, \lambda_t) + \frac{b_t}{2} \lambda_{t+1}^2 - \frac{b_{t-1}}{2} \lambda_t^2 \\
& + \left( -\frac{16(C_\sigma^V)^2}{\xi b_{t+1}^2} - \frac{\xi(C_\sigma^V)^2}{2} \right) \|\theta_{t+1} - \theta_t\|^2 - \left( -\frac{16(C_\sigma^V)^2}{\xi b_t^2} - \frac{\xi(C_\sigma^V)^2}{2} \right) \|\theta_t - \theta_{t-1}\|^2 \\
& + \left( \frac{8}{\xi} - \frac{1}{2\xi} \right) (\lambda_{t+1} - \lambda_t)^2 - \left( \frac{8}{\xi} - \frac{1}{2\xi} \right) (\lambda_t - \lambda_{t-1})^2 \\
& \geq S_t + \left( \frac{\mu_t}{2} + \nu - \frac{16(C_\sigma^V)^2}{\xi b_{t+1}^2} - \frac{\xi(C_\sigma^V)^2}{2} \right) \|\theta_{t+1} - \theta_t\|^2 + \frac{b_t - b_{t-1}}{2} \lambda_{t+1}^2 \\
& + \left( \frac{8}{\xi} - \frac{1}{2\xi} - \frac{28}{5\xi} - \frac{1}{\xi} \right) (\lambda_{t+1} - \lambda_t)^2 + \frac{8}{\xi} \left( \frac{b_t}{b_{t+1}} - \frac{b_{t-1}}{b_t} \right) \lambda_{t+1}^2 \\
& = S_t + \left( \frac{\mu_t}{2} + \nu - \frac{16(C_\sigma^V)^2}{\xi b_{t+1}^2} - \frac{\xi(C_\sigma^V)^2}{2} \right) \|\theta_{t+1} - \theta_t\|^2 + \frac{b_t - b_{t-1}}{2} \lambda_{t+1}^2 \\
& + \frac{9}{10\xi} (\lambda_{t+1} - \lambda_t)^2 + \frac{8}{\xi} \left( \frac{b_t}{b_{t+1}} - \frac{b_{t-1}}{b_t} \right) \lambda_{t+1}^2, \tag{111}
\end{aligned}$$

which then completes the proof.  $\square$

We now restate Theorem 2 with all the specific step sizes. The definitions of these constants can also be found in Section J.

**Theorem 3.** (Restatement of Theorem 2) Set  $b_t = \frac{19}{20\xi t^{0.25}}$ ,  $\mu_t = \xi(C_\sigma^V)^2 + \frac{16\tau(C_\sigma^V)^2}{\xi(b_{t+1})^2} - 2\nu$ ,  $\beta_t = \frac{1}{\xi}$ ,  $\alpha_t = \nu + \mu_t$ , where  $\xi > \frac{2\nu + (1+A^*)L_\sigma}{(C_\sigma^V)^2}$ ,  $\nu$  is any positive number and  $\tau$  is any number greater than 2. Moreover, set  $\epsilon_{est} = \frac{1}{t^{0.5}L_\Omega} \frac{1}{32t^{0.25}A^* + 2A^* + \frac{1}{\alpha_1}(1+A^*)C_\sigma^V} \frac{19^2\epsilon^2}{3200\xi(\tau-2)(C_\sigma^V)^2uL_\Omega} = \mathcal{O}(\frac{\epsilon^2}{t^{0.75}})$ , then

$$\min_{1 \leq t \leq T} \|G_t^\sigma\|^2 \leq (1 + \sqrt{2})\epsilon, \tag{112}$$

when  $T = \mathcal{O}(\epsilon^{-4})$ .

*Proof.* Denote by  $p_t \triangleq \frac{8(\tau-2)(C_\sigma^V)^2}{\xi b_{t+1}^2}$  and  $M_1 \triangleq \frac{16\tau^2}{(\tau-2)^2} + \frac{(\xi(C_\sigma^V)^2 - \nu)^2}{64(\tau-2)^2(C_\sigma^V)^2\xi^2}$ . Then it can be verified that  $\nu + \frac{\mu_t}{2} - \frac{\xi(C_\sigma^V)^2}{2} - \frac{16(C_\sigma^V)^2}{\xi b_{t+1}^2} = p_t$ . Then eq. (111) can be rewritten as

$$\begin{aligned}
F_{t+1} - F_t & \geq S_t + p_t \|\theta_{t+1} - \theta_t\|^2 + \frac{b_t - b_{t-1}}{2} \lambda_{t+1}^2 \\
& + \frac{9}{10\xi} (\lambda_{t+1} - \lambda_t)^2 + \frac{8}{\xi} \left( \frac{b_t}{b_{t+1}} - \frac{b_{t-1}}{b_t} \right) \lambda_{t+1}^2. \tag{113}
\end{aligned}$$

From the definition, we have that

$$G_t^\sigma = \begin{bmatrix} \beta_t \left( \lambda_t - \Pi_{[0, A^*]} \left( \lambda_t - \frac{1}{\beta_t} (\nabla_\lambda V_\sigma^L(\theta_t, \lambda_t)) \right) \right) \\ \alpha_t \left( \theta_t - \Pi_\Theta \left( \theta_t + \frac{1}{\alpha_t} (\nabla_\theta V_\sigma^L(\theta_t, \lambda_t)) \right) \right) \end{bmatrix}, \tag{114}$$

and denote by

$$\tilde{G}_t \triangleq \begin{bmatrix} \beta_t \left( \lambda_t - \Pi_{[0, A^*]} \left( \lambda_t - \frac{1}{\beta_t} (\nabla_\lambda \tilde{V}_t(\theta_t, \lambda_t)) \right) \right) \\ \alpha_t \left( \theta_t - \Pi_\Theta \left( \theta_t + \frac{1}{\alpha_t} (\nabla_\theta \tilde{V}_t(\theta_t, \lambda_t)) \right) \right) \end{bmatrix}. \tag{115}$$

It can be verified that

$$\|G_t^\sigma\| - \|\tilde{G}_t\| \leq b_{t-1} |\lambda_t|. \tag{116}$$

From Theorem 4.2 in (Xu et al., 2020), it can be shown that

$$\|\tilde{G}_t\|^2 \leq 2(\mu_t + \nu)^2 \|\theta_{t+1} - \theta_t\|^2 + \left( 2(C_\sigma^V)^2 + \frac{1}{\xi^2} \right) (\lambda_{t+1} - \lambda_t)^2, \tag{117}$$

and

$$M_1 \geq \frac{2(\nu + \mu_t)^2}{p_t^2}. \quad (118)$$

Hence

$$\|\tilde{G}_t\|^2 \leq M_1 p_t^2 \|\theta_{t+1} - \theta_t\|^2 + \left(2(C_\sigma^V)^2 + \frac{1}{\xi^2}\right) (\lambda_{t+1} - \lambda_t)^2. \quad (119)$$

Set  $u_t \triangleq \frac{1}{\max\left\{M_1 p_t, \frac{10+20\xi^2(C_\sigma^V)^2}{9\xi}\right\}}$ , then from eq. (113), we have that

$$u_t \|\tilde{G}_t\|^2 \leq F_{t+1} - F_t - S_t - \frac{b_t - b_{t-1}}{2} \lambda_{t+1}^2 - \frac{8}{\xi} \left(\frac{b_t}{b_{t+1}} - \frac{b_{t-1}}{b_t}\right) \lambda_{t+1}^2. \quad (120)$$

Summing the inequality above from  $t = 1$  to  $T$ , then

$$\begin{aligned} \sum_{t=1}^T u_t \|\tilde{G}_t\|^2 &\leq F_{T+1} - F_1 - \sum_{t=1}^T S_t + \frac{8}{\xi} \left(\frac{b_0}{b_1} \lambda_1^2 - \frac{b_T}{b_{T+1}} \lambda_{T+1}^2\right) + \left(\frac{b_0 - b_T}{2} (\Lambda^*)^2\right) \\ &\leq F_{T+1} - F_1 - \sum_{t=1}^T S_t + \frac{8}{\xi} \frac{b_0}{b_1} (\Lambda^*)^2 + \left(\frac{b_0 - b_T}{2} (\Lambda^*)^2\right), \end{aligned} \quad (121)$$

which is from  $b_t$  is decreasing and  $\lambda_t < \Lambda^*$ . Note that

$$\begin{aligned} \max_{t \geq 1} \max_{\theta \in \Theta, \lambda \in [0, \Lambda^*]} F_t &= \max \left\{ -\frac{8}{\xi^2 b_{t+1}} (\lambda_t - \lambda_{t+1})^2 - \frac{8}{\xi} \left(1 - \frac{b_t}{b_{t+1}}\right) \lambda_{t+1}^2 + V_\sigma^L(\theta_{t+1}, \lambda_{t+1}) + \frac{b_t}{2} \lambda_{t+1}^2 \right. \\ &\quad \left. + \left(-\frac{16(C_\sigma^V)^2}{\xi b_{t+1}^2} - \frac{\xi(C_\sigma^V)^2}{2}\right) \|\theta_{t+1} - \theta_t\|^2 + \left(\frac{8}{\xi} - \frac{1}{2\xi}\right) (\lambda_{t+1} - \lambda_t)^2 \right\} \\ &\leq \frac{1.6}{\xi} (\Lambda^*)^2 + (1 + \Lambda^*)(2C_\sigma) + \frac{b_1}{2} (\Lambda^*)^2 + \frac{15}{2\xi} (\Lambda^*)^2 \\ &\triangleq F^*, \end{aligned} \quad (122)$$

which is from the definition of  $b_t$ , and  $8(\frac{b_t}{b_{t+1}} - 1) \leq 8(\frac{(t+1)^{0.25}}{t^{0.25}} - 1) \leq 8(\frac{2^{0.25}}{1} - 1) < 1.6$ . Then plugging in the definition of  $b_t$  implies that

$$\sum_{t=1}^T u_t \|\tilde{G}_t\|^2 \leq F^* - F_1 - \sum_{t=1}^T S_t + \frac{8}{\xi} (\Lambda^*)^2 + \left(\frac{b_0}{2} (\Lambda^*)^2\right). \quad (123)$$

If moreover set  $u \triangleq \max\left\{M_1, \frac{10+20\xi^2(C_\sigma^V)^2}{9\xi p_2}\right\}$ , then  $u_t \geq \frac{1}{up_t}$ , and hence

$$\frac{\sum_{t=1}^T \frac{1}{p_t} \|\tilde{G}_t\|^2}{\sum_{t=1}^T \frac{1}{p_t}} \leq \frac{u}{\sum_{t=1}^T \frac{1}{p_t}} \left(F^* - F_1 - \sum_{t=1}^T S_t + \frac{8}{\xi} (\Lambda^*)^2 + \left(\frac{b_0}{2} (\Lambda^*)^2\right)\right). \quad (124)$$

Plug in the definition of  $p_t$  then we have that

$$\frac{\sum_{t=1}^T \frac{1}{p_t} \|\tilde{G}_t\|^2}{\sum_{t=1}^T \frac{1}{p_t}} \leq \frac{3200\xi(\tau-2)(C_\sigma^V)^2 d}{19^2(\sqrt{T}-2)} \left(F^* - F_1 - \sum_{t=1}^T S_t + \frac{8}{\xi} (\Lambda^*)^2 + \left(\frac{b_0}{2} (\Lambda^*)^2\right)\right). \quad (125)$$

We moreover have that

$$\begin{aligned} |S_t| &= \left| \frac{16}{b_t \xi} (f(\theta_{t-1}) - \hat{f}(\theta_{t-1}) - f(\theta_t) + \hat{f}(\theta_t))(-\lambda_t + \lambda_{t+1}) + (f(\theta_{t-1}) - \hat{f}(\theta_{t-1}))(\lambda_{t+1} - \lambda_t) \right. \\ &\quad \left. + \langle \theta_{t+1} - \theta_t, -\hat{g}(\theta_t, \lambda_{t+1}) + g(\theta_t, \lambda_{t+1}) \rangle \right| \\ &\leq 32t^{0.25} \Lambda^* (\Omega_{t-1} + \Omega_t) + 2\Lambda^* \Omega_{t-1} + \frac{1}{\alpha_t} (1 + \Lambda^*) C_\sigma^V \Omega_t, \end{aligned} \quad (126)$$

where  $\Omega_t \triangleq \max \left\{ \|g(\theta_t, \lambda_{t+1}) - \hat{g}(\theta_t, \lambda_{t+1})\|, |f(\theta_t) - \hat{f}(\theta_t)| \right\}$ . Note that it has been shown in (Wang & Zou, 2022) that  $\Omega_t \leq L_\Omega \max \left\{ \|Q_{\sigma,r} - \hat{Q}_{\sigma,r}\|, \|Q_{\sigma,c} - \hat{Q}_{\sigma,c}\| \right\} = L_\Omega \epsilon_{\text{est}}$ , and hence  $\Omega_t$  can be controlled by setting  $\epsilon_{\text{est}}$ .

Note that  $\alpha_t = \nu + \mu_t$  is increasing, hence  $\frac{1}{\alpha_t} \leq \frac{1}{\alpha_1}$ . Hence if we set  $\epsilon_{\text{est}} = \frac{1}{t^{0.5} L_\Omega} \frac{1}{32t^{0.25} \Lambda^* + 2\Lambda^* + \frac{1}{\alpha_1}(1+\Lambda^*)C_\sigma^V} \frac{19^2 \epsilon^2}{3200\xi(\tau-2)(C_\sigma^V)^2 u L_\Omega} = \mathcal{O}(\frac{\epsilon^2}{t^{0.75}})$ , then

$$|S_t| \leq \frac{1}{t^{0.5}} \frac{19^2 \epsilon^2}{3200\xi(\tau-2)(C_\sigma^V)^2 u L_\Omega}, \quad (127)$$

and hence

$$\left| \sum_{t=1}^T S_t \right| \leq \sqrt{T} \frac{19^2 \epsilon^2}{3200\xi(\tau-2)(C_\sigma^V)^2 u L_\Omega}. \quad (128)$$

Thus plug in eq. (125) and we have that

$$\frac{\sum_{t=1}^T \frac{1}{p_t} \|\tilde{G}_t\|^2}{\sum_{t=1}^T \frac{1}{p_t}} \leq \frac{3200\xi(\tau-2)(C_\sigma^V)^2 u}{19^2(\sqrt{T}-2)} K + \epsilon^2, \quad (129)$$

where  $K = F^* - F_1 + \frac{8}{\xi}(\Lambda^*)^2 + \left(\frac{b_1}{2}(\Lambda^*)^2\right)$ . When  $T = \left(2 + \frac{3200\xi(\tau-2)(C_\sigma^V)^2 u K}{19^2 \epsilon^2}\right)^2$ , we have that

$$\frac{\sum_{t=1}^T \frac{1}{p_t} \|\tilde{G}_t\|^2}{\sum_{t=1}^T \frac{1}{p_t}} \leq 2\epsilon^2. \quad (130)$$

Similarly to Theorem 4.2 in (Xu et al., 2020), if  $t > \frac{19^4(\Lambda^*)^4}{2 \cdot 10^4 \xi^4 \epsilon^4}$ , then  $b_{t-1} < \frac{\epsilon}{\Lambda^*}$  and  $b_{t-1} \lambda_t < \epsilon$ . Hence combine with eq. (116) we finally have that

$$\min_{1 \leq t \leq T} \|G_t^\sigma\| \leq (1 + \sqrt{2})\epsilon, \quad (131)$$

when  $T = \max \left\{ \frac{7(\Lambda^*)^4}{\xi^4 \epsilon^4}, \left(2 + \frac{9\xi(\tau-2)(C_\sigma^V)^2 u K}{\epsilon^2}\right)^2 \right\} = \mathcal{O}(\epsilon^{-4})$ .  $\square$

**Remark 1.** Note that the sample complexity of robust TD algorithm to achieve an  $\epsilon_{\text{est}}$ -error bound is  $\mathcal{O}(\epsilon_{\text{est}}^{-2})$ , hence the sample complexity at the time step  $t$  is  $\mathcal{O}(\epsilon_{\text{est}}^{-2}) = \mathcal{O}(\frac{t^{1.5}}{\epsilon^4})$ . Thus the total sample complexity to find an  $\epsilon$ -stationary solution is  $\sum_{t=1}^T \frac{t^{1.5}}{\epsilon^4} = \mathcal{O}(\epsilon^{-14})$ . This great increasing of complexity is due to the estimation of robust value functions.

## J CONSTANTS AND NOTATIONS

In this section, we summarize the definitions of all the constants we used in this paper.

$$\begin{aligned} L_V &= \frac{k|\mathcal{A}|}{(1-\gamma)^2}, \\ C_\sigma &= \frac{1}{1-\gamma} \left(1 + 2\gamma\delta \frac{\log |\mathcal{S}|}{\sigma}\right), \\ C_\sigma^V &= \frac{1}{1-\gamma} |\mathcal{A}| k C_\sigma, \\ k_B &= \frac{1}{1-\gamma+\gamma\delta} (|\mathcal{A}| C_\sigma l + |\mathcal{A}| k C_\sigma^V) + \frac{2|\mathcal{A}|^2 \gamma (1-\delta)}{(1-\gamma+\gamma\delta)^2} k^2 C_\sigma, \\ L_\sigma &= k_B + \frac{\gamma\delta}{1-\gamma} \left( \sqrt{|\mathcal{S}|} k_B + 2\sigma |\mathcal{S}| C_\sigma^V \frac{1}{1-\gamma+\gamma\delta} k |\mathcal{A}| C_\sigma \right), \\ b_t &= \frac{19}{20\xi t^{0.25}}, \end{aligned}$$

$$\begin{aligned}
M_1 &= \frac{16\tau^2}{(\tau-2)^2} + \frac{(\xi(C_\sigma^V)^2 - \nu)^2}{64(\tau-2)^2(C_\sigma^V)^2\xi^2}, \\
u &= \max \left\{ M_1, \frac{10 + 20\xi^2(C_\sigma^V)^2}{9\xi p_2} \right\}, \\
F^* &= \frac{1.6}{\xi}(\Lambda^*)^2 + (1 + \Lambda^*)(2C_\sigma) + \frac{b_1}{2}(\Lambda^*)^2 + \frac{15}{2\xi}(\Lambda^*)^2, \\
K &= F^* - F_1 + \frac{8}{\xi}(\Lambda^*)^2 + \left( \frac{b_1}{2}(\Lambda^*)^2 \right), \\
\mu_t &= \xi(C_\sigma^V)^2 + \frac{16\tau(C_\sigma^V)^2}{\xi(b_{t+1})^2} - 2\nu, \\
\beta_t &= \frac{1}{\xi}, \\
\alpha_t &= \nu + \mu_t.
\end{aligned} \tag{132}$$
